# Supplementary material for: Structure-Based Discovery of N-Sulfonylpiperidine-3-Carboxamides as Novel Capsid Assembly Modulators for Potent Inhibition of HBV Replication
Source: Viruses. 2022 Feb 8;14(2):348. doi: 10.3390/v14020348 (PMC8876525; doi:10.3390/v14020348)

Supplementary Materials

# Structure-Based Discovery of *N*-Sulfonylpiperidine-3-carboxamides as Novel Capsid Assembly Modulators for Potent Inhibition of HBV Replication

Yang Yang †, Yu Yan †, Jiaxin Yin, Jie Hu, Xuefei Cai, Jieli Hu, Jie Xia, Kai Wang, Ni Tang \* and Luyi Huang \*

**Table S1.** Primer sequences for RT-qPCR.

|                                                           |                              |
|-----------------------------------------------------------|------------------------------|
| HBV 3.5 kb RNA<br>(nt) 2150 to 2300                       | Former primer :              |
|                                                           | 5'-CCTAGTAGTCAGTTATGTCAAC-3' |
|                                                           | Reverse primer:              |
|                                                           | 5'-TCTATAAGCTGGAGGAGTGCGA-3' |
| Total HBV RNAs<br>(nt) 3058 to 3158                       | Former primer :              |
|                                                           | 5'- ACCGACCTTGAGGCATACTT-3'  |
|                                                           | Reverse primer :             |
|                                                           | 5'- GCCTACAGCCTCCTAGTACA -3' |
| HBV core DNA<br>(nt) 1770 to 2105                         | Former primer :              |
|                                                           | 5'-CCTCTTCATCCTGCTGCT-3'     |
|                                                           | Reverse primer :             |
|                                                           | 5'-AACTGAAAGCCAAACAGTG-3'    |
| HBV cccDNA<br>(nt) 1545 to 1899                           | Former primer :              |
|                                                           | 5'-CTCCCCGTCTGTGCCTTCT-3'    |
|                                                           | Reverse primer :             |
|                                                           | 5'-CCCCAAAGCCACCCAAG-3'      |
| cccDNA probe: FAM-ACGTCGCATGGAGACCAC-<br>CGTGAACGCC-TAMRA |                              |

**Table S2.** Chemical structures and anti-HBV DNA activities of C-1 – C-24.

| Compound | Vendor ID | Structure                                                                            | Residual HBV DNA<br>Level (%) at 20 $\mu$ M |
|----------|-----------|--------------------------------------------------------------------------------------|---------------------------------------------|
| C-1      | STL173465 | 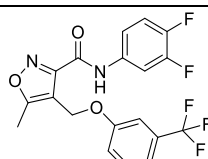 | 62                                          |
| C-2      | STL390663 | 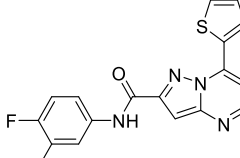 | 44                                          |
| C-3      | STL102917 | 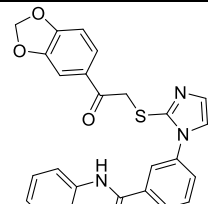 | 22                                          |

|      |           |                                                                                      |    |
|------|-----------|--------------------------------------------------------------------------------------|----|
| C-4  | STK654654 | 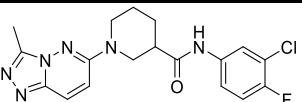   | 21 |
| C-5  | STL344232 | 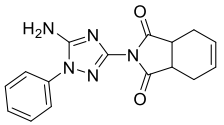   | 51 |
| C-6  | STK607709 | 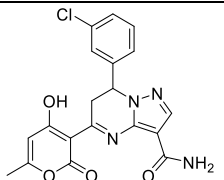   | 36 |
| C-7  | 5236-0418 | 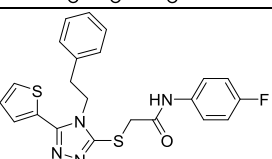   | 13 |
| C-8  | D359-0746 | 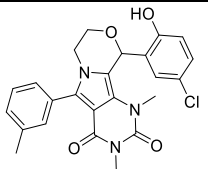   | 28 |
| C-9  | L949-2795 | 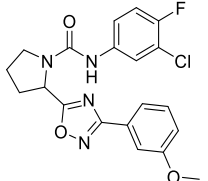 | 11 |
| C-10 | C453-0014 | 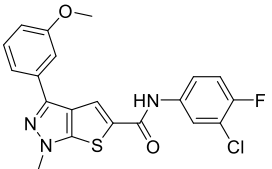 | 29 |
| C-11 | G214-4780 | 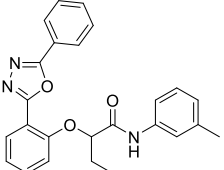 | 59 |
| C-12 | 8018-8334 | 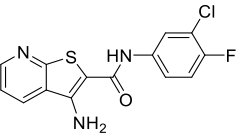 | 36 |
| C-13 | K889-0488 | 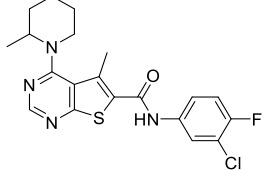 | 44 |
| C-14 | K838-0091 | 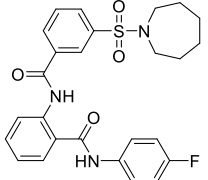 | 68 |

|      |           |                                                                                      |    |
|------|-----------|--------------------------------------------------------------------------------------|----|
| C-15 | G808-0068 | 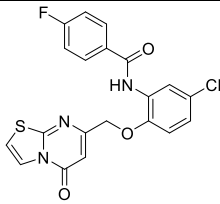   | 60 |
| C-16 | L860-0145 | 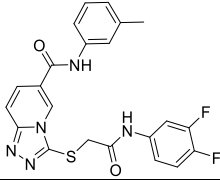   | 4  |
| C-17 | F550-3276 | 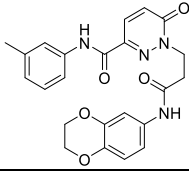   | 21 |
| C-18 | F184-1704 | 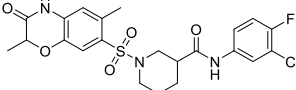   | 2  |
| C-19 | K781-8075 | 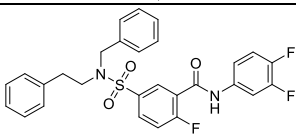  | 3  |
| C-20 | L810-0114 | 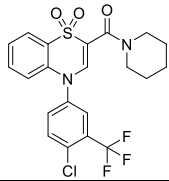 | 32 |
| C-21 | C326-0005 | 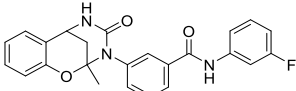 | 51 |
| C-22 | D473-1628 | 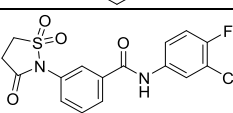 | 29 |
| C-23 | 8017-8758 | 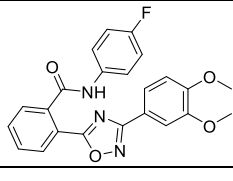 | 27 |
| C-24 | F589-0013 | 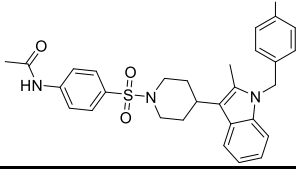 | 53 |

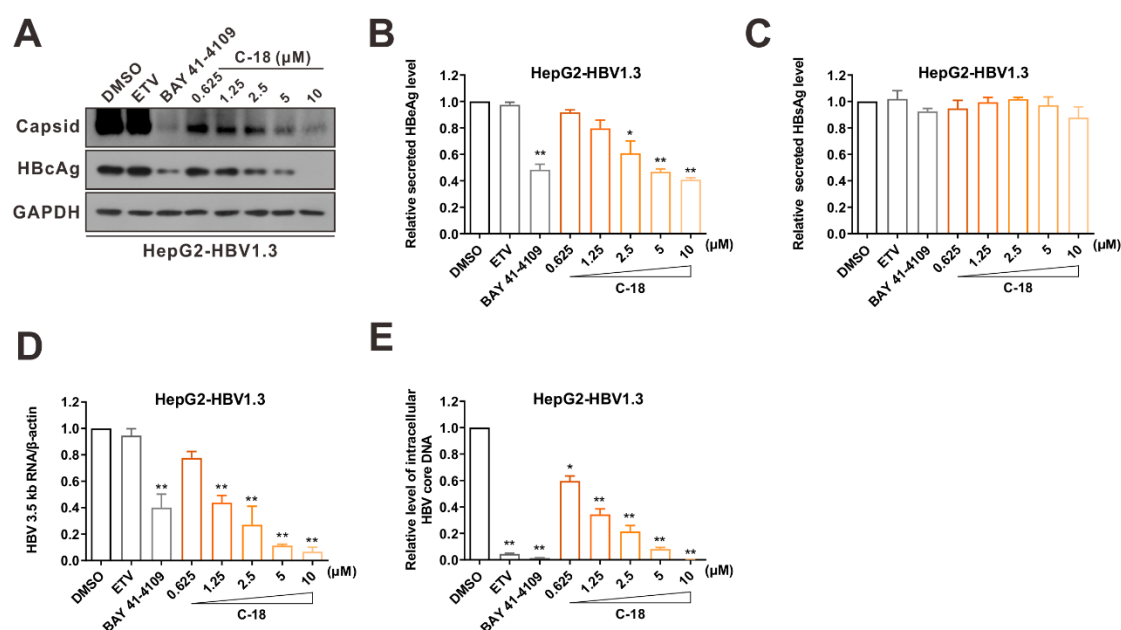

**Figure S1.** C-18 inhibits HBV replication and capsid formation in HepG2-HBV1.3 cells. (A) Effects of C-18 on intracellular HBV capsid formation and HBc. HepG2-HBV1.3 cells were incubated with indicated concentrations of C-18 for 6 days. Capsid and HBV core protein were probed with anti-HBV core antibody, and GAPDH was used as a loading control. (B–E) Effect of C-18 on HBV replication. HepG2-HBV1.3 cells were incubated with indicated concentrations of C-18 for 6 days. Secreted HBeAg (B) and HBsAg (C) were determined by ELISA, intracellular HBV 3.5 kb RNA (D) and HBV DNA (E) were measured by qPCR. ETV (25 nM), and BAY 41-4109 (2 μM) were used as controls. The data in (B–E) are representative of three independent experiments and are expressed as mean ± SD (Student's *t*-test was used to assess the statistical significance between DMSO group against any other treatment, \**p* < 0.05; \*\**p* < 0.01).

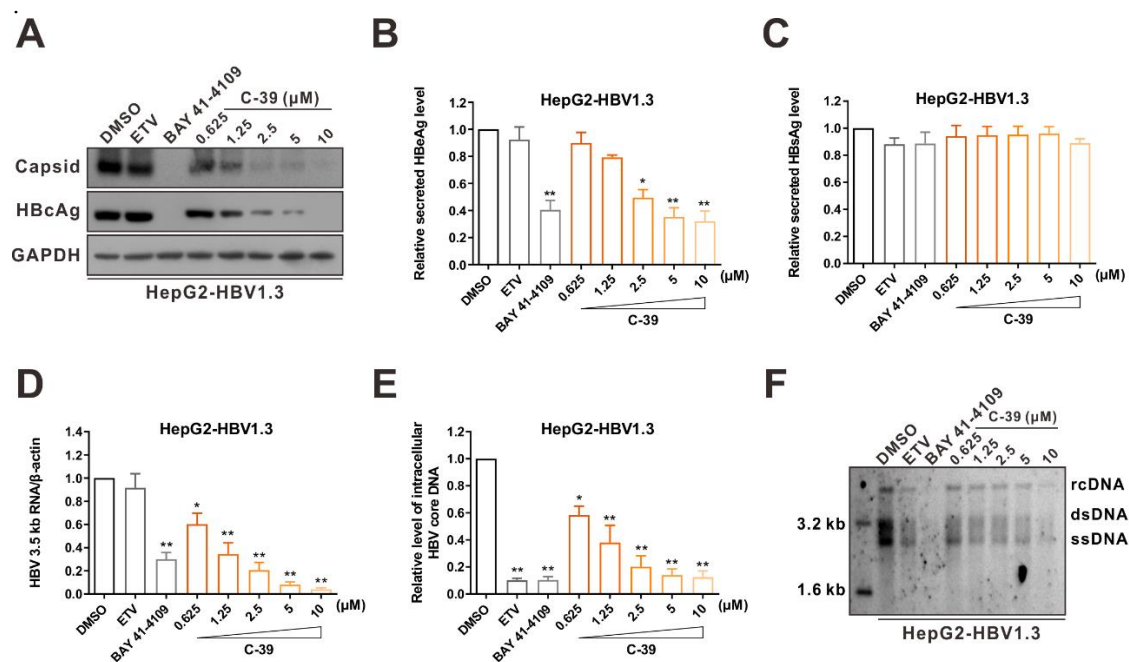

**Figure S2.** C-39 significantly inhibits HBV replication in HepG2-HBV1.3 cells. HepG2-HBV1.3 cells were incubated with the indicated concentrations of C-39 for 6 days. **(A)** Effects of C-39 on intracellular HBV capsid formation and HBc. HBV capsid and core protein were assessed by anti-HBV core antibody. **(B–F)** Effects of C-39 on HBV replication. Secreted HBeAg **(B)** and HBsAg **(C)** were determined by ELISA, intracellular HBV 3.5 kb RNA **(D)** and core DNA **(E)** were measured by qPCR, and HBV replication intermediates (RIs) were assessed by Southern blotting assay **(F)**. ETV (25 nM) and BAY 41-4109 (2 μM) were used as controls. The data in **(B–E)** are representative of three independent experiments and are expressed as mean ± SD (Student's *t*-test was used to assess the statistical significance between DMSO group against any other treatment, \**p* < 0.05; \*\**p* < 0.01).

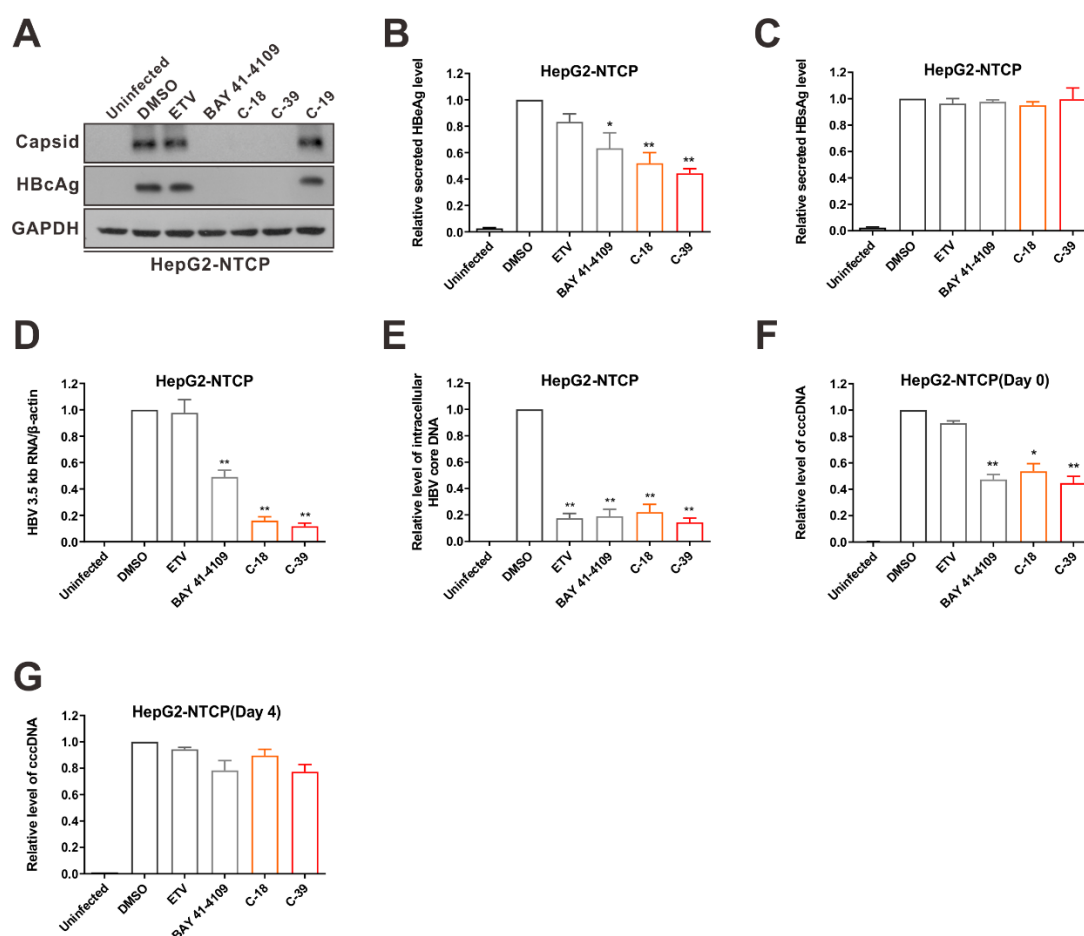

**Figure S3.** C-39 significantly inhibits HBV replication in de novo infection model. HepG2-NTCP cells were incubated with the indicated concentrations of C-39 for 6 days. **(A)** Effects of C-39 on intracellular HBV capsid assembly. HBV capsids and core protein were assessed by anti-HBV core antibody. **(B-F)** Effects of C-39 on HBV replication. Secreted HBeAg **(B)** and HBsAg **(C)** were determined by ELISA, intracellular HBV 3.5 kb RNA **(D)** and core DNA **(E)** were measured by qPCR. ETV (25 nM) and BAY 41-4109 (2 μM) were used as controls. **(F-G)** HBV cccDNA levels in HepG2-NTCP cells when HepG2-NTCP cells were infected with HBV and treated with different compounds either together with the viral inoculum (day 0, **F**) or at 4 days after infection (day 4, **G**). C-18, C-19, and C-39 were used at 5 μM. ETV (25 nM) and BAY 41-4109 (2 μM) were used as controls. The data in **(B-G)** are representative of three independent experiments and are expressed as mean ± SD (Student's *t*-test was used to assess the statistical significance between DMSO group against any other treatment, \**p* < 0.05; \*\**p* < 0.01).

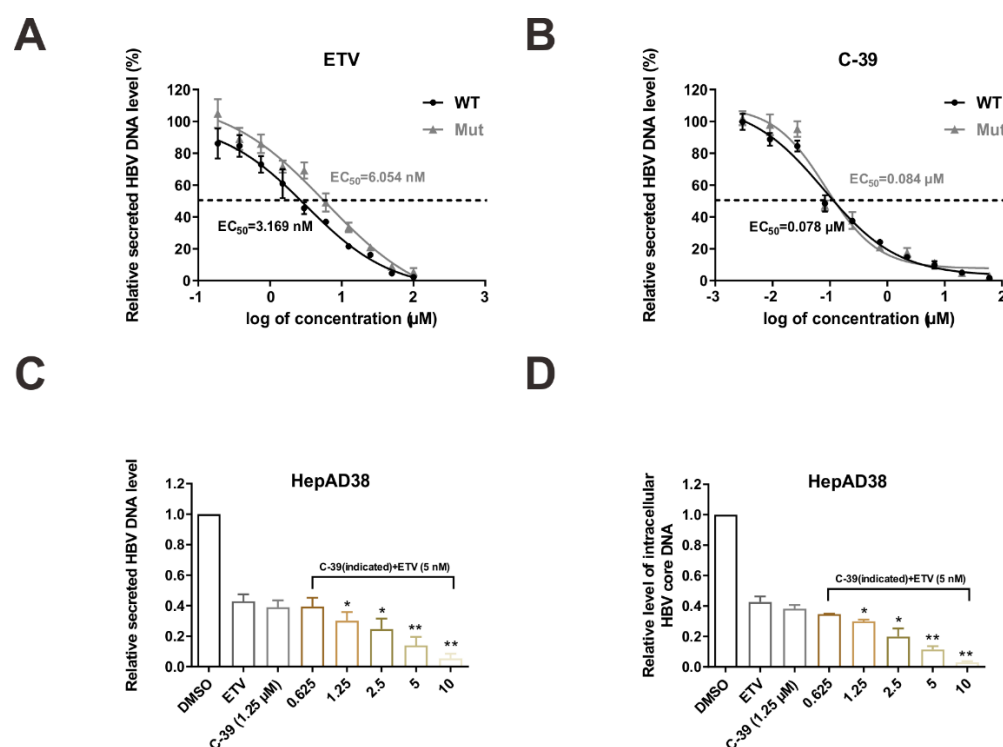

**Figure S4.** C-39 inhibits ETV-resistant HBV replication and the combination of C-39 and ETV enhances the suppression of HBV replication. Antiviral activity of ETV (**A**) and C-39 (**B**) by presence or absence of nucleos(t)ide-resistant mutations. Secreted HBV DNA (**C**) and intracellular HBV core DNA (**D**) levels in response to the treatment of ETV in combination with increasing doses of C-39. The data are representative of three independent experiments and are expressed as mean  $\pm$  SD (Student's *t*-test was used to assess the statistical significance between combination against any other treatment, \**p* < 0.05; \*\**p* < 0.01).

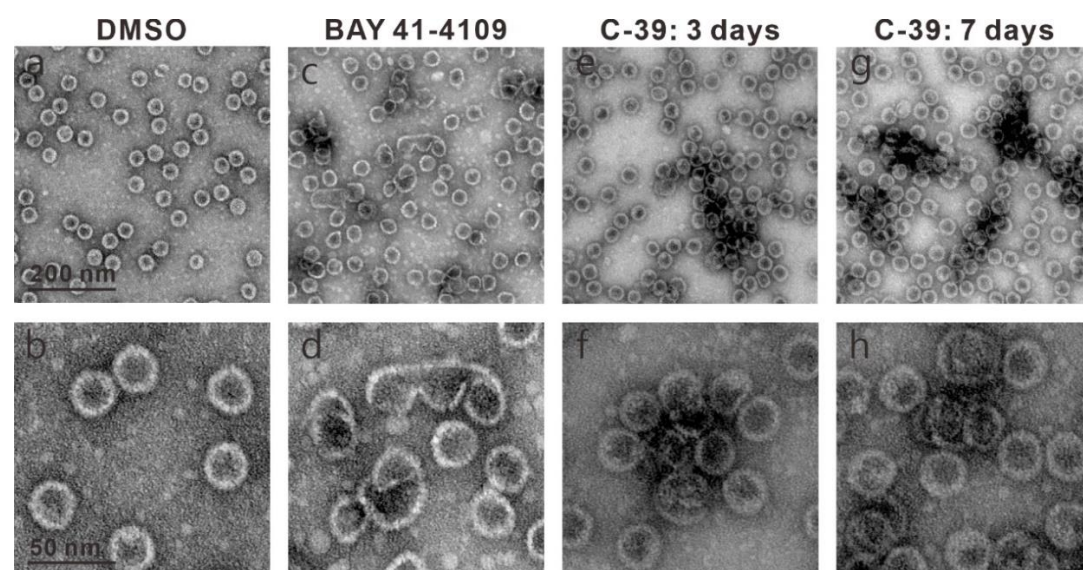

**Figure S5.** Electron microscopy analysis of the effects on capsid assembly. Recombinant Cp149 was treated with DMSO, 5  $\mu\text{M}$  BAY 41-4109 for 3 days or 20  $\mu\text{M}$  C-39 for 3 and 7 days in 300 mM NaCl and 150 mM HEPES (pH 7.5). Electron microscopic images of capsids are shown. Scale bars = 200 nm (up) and 50 nm (down).

<sup>1</sup>H NMR Spectra of SPCs

C-18

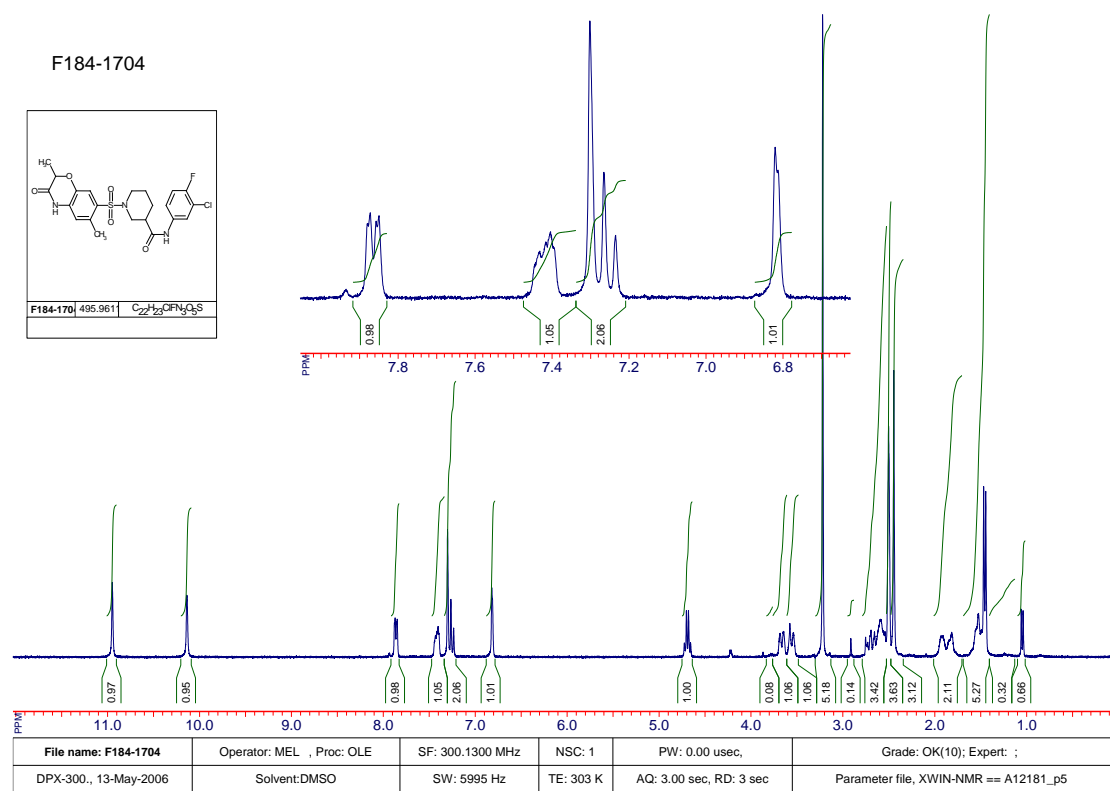

C-29

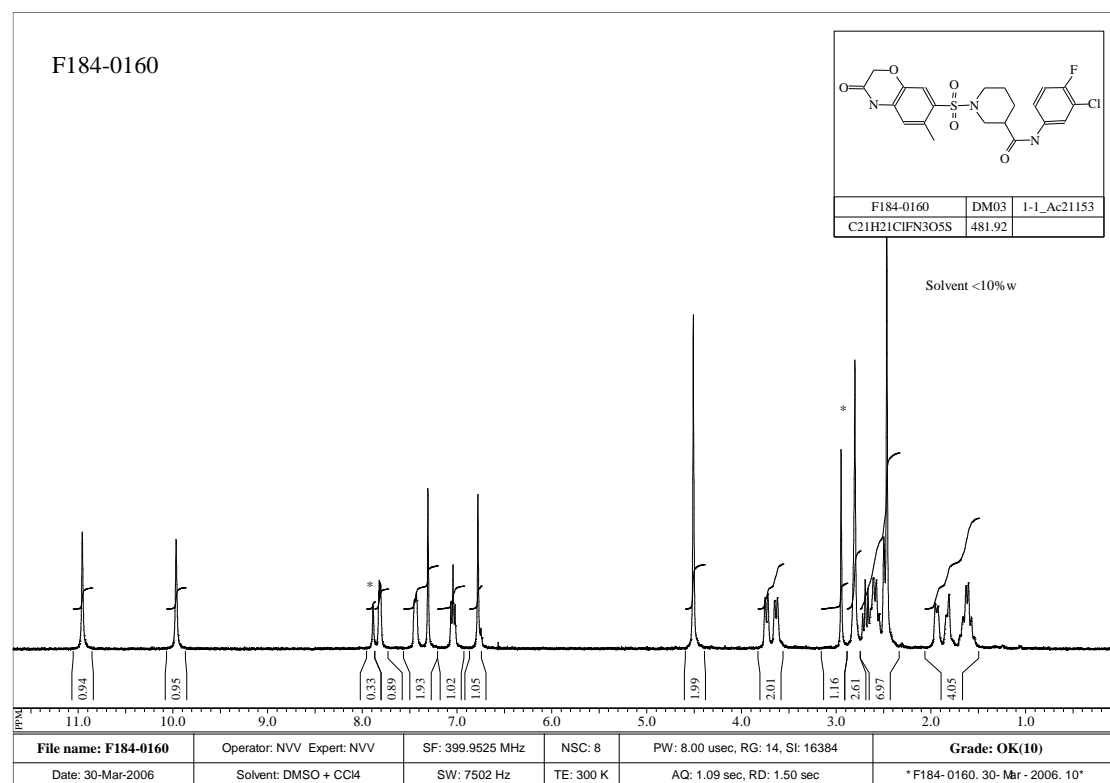

C-30

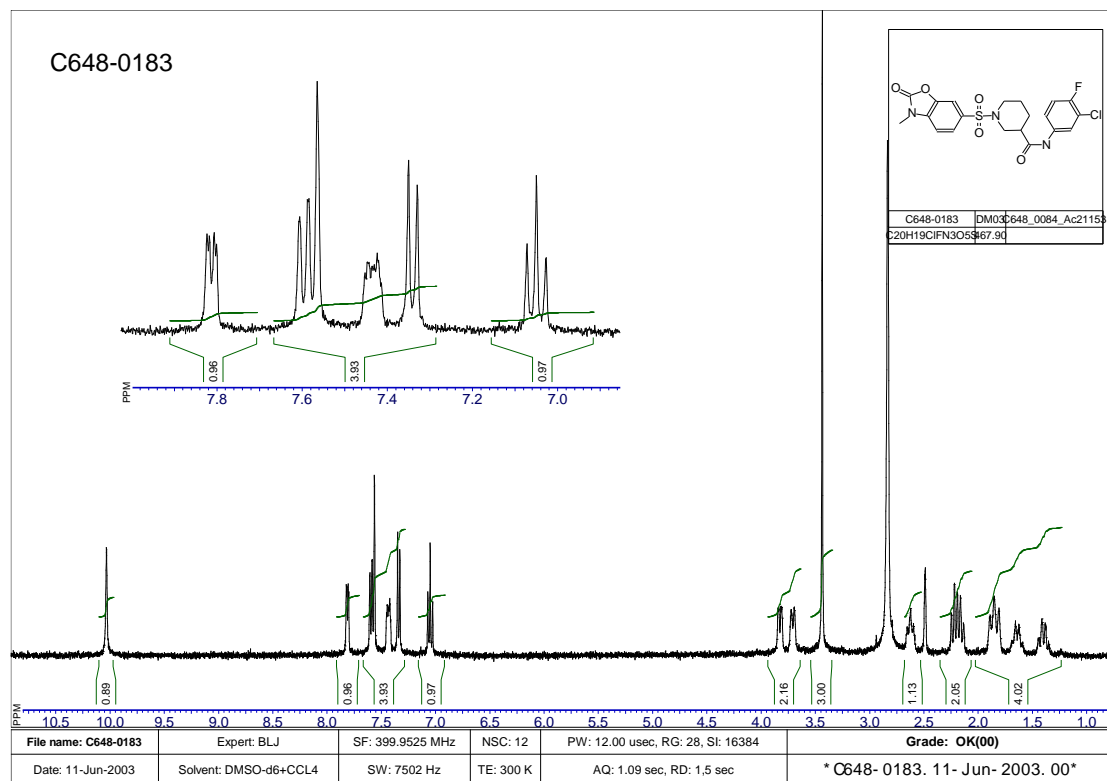

C-31

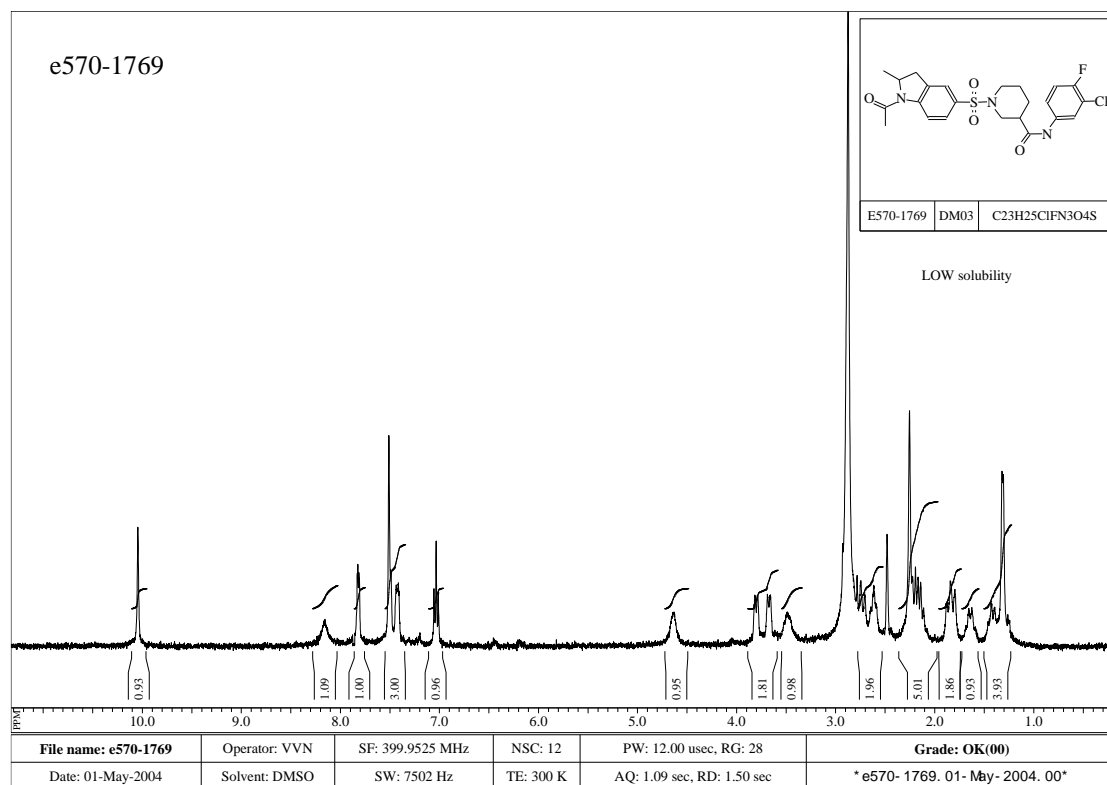

C-32

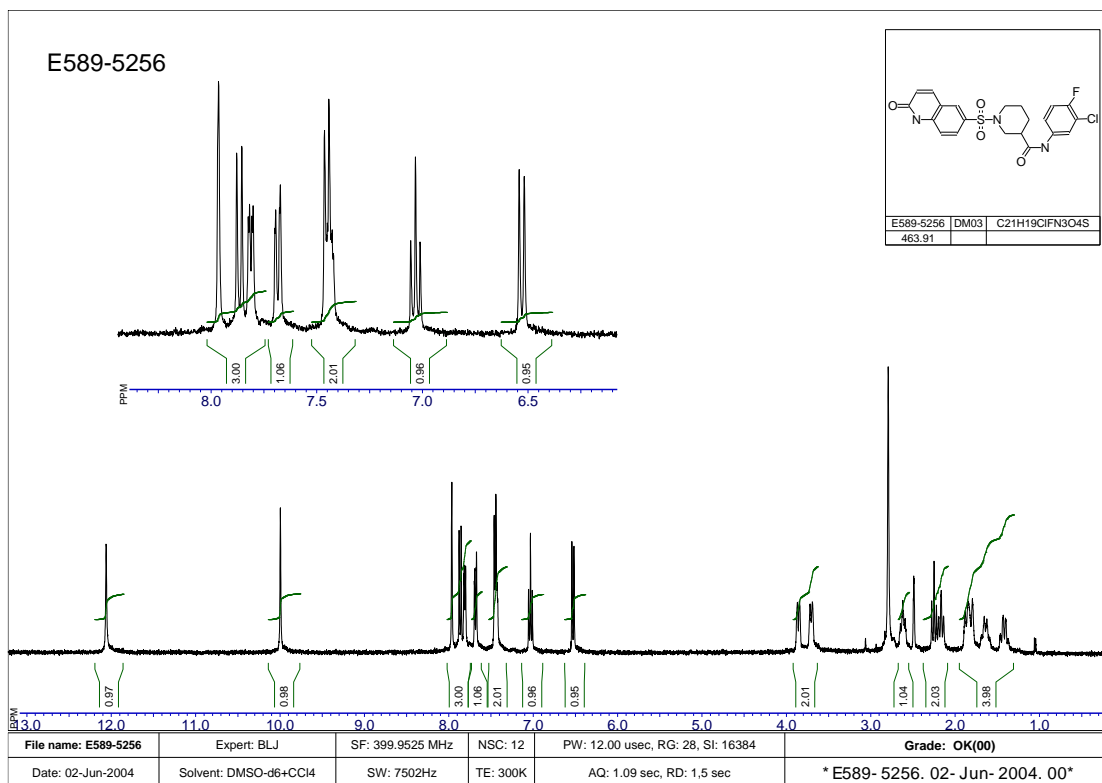

C-33

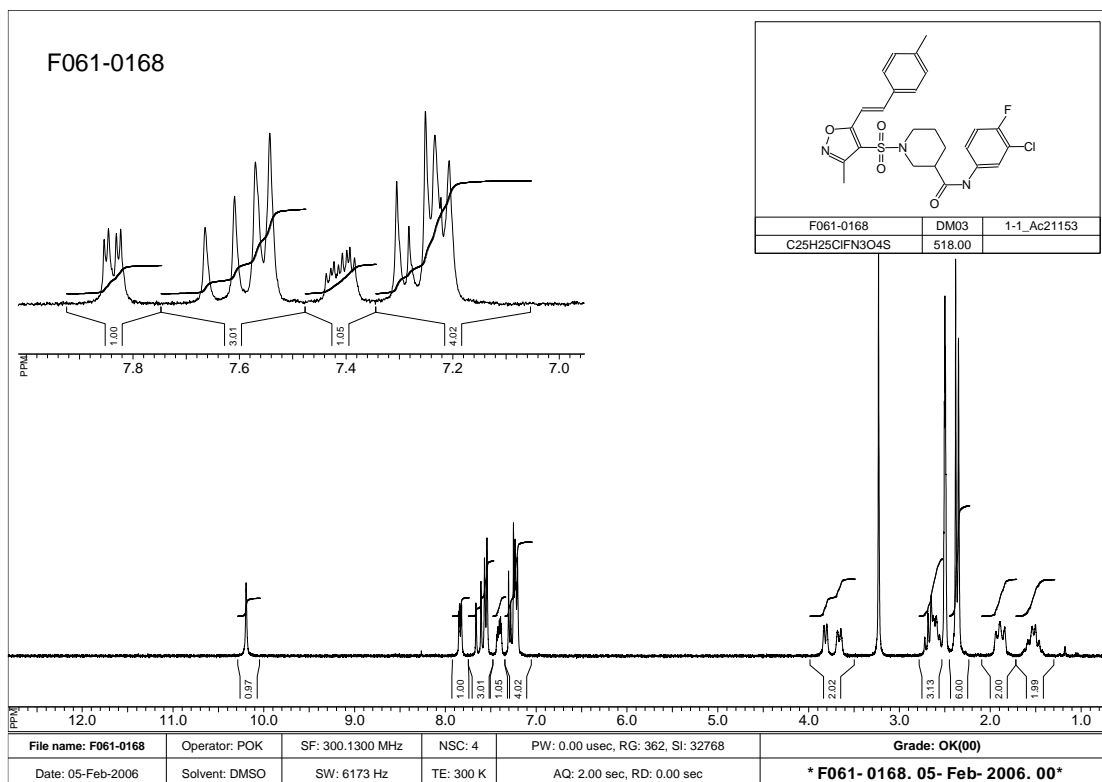

C-34

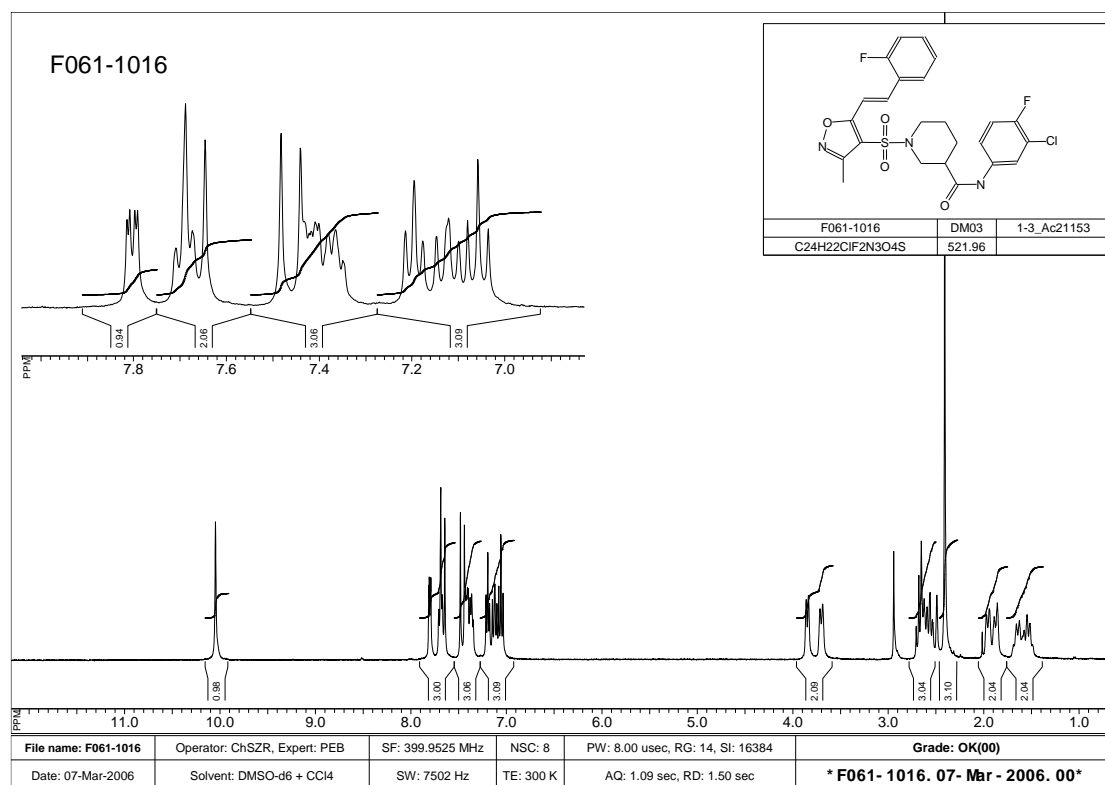

C-35

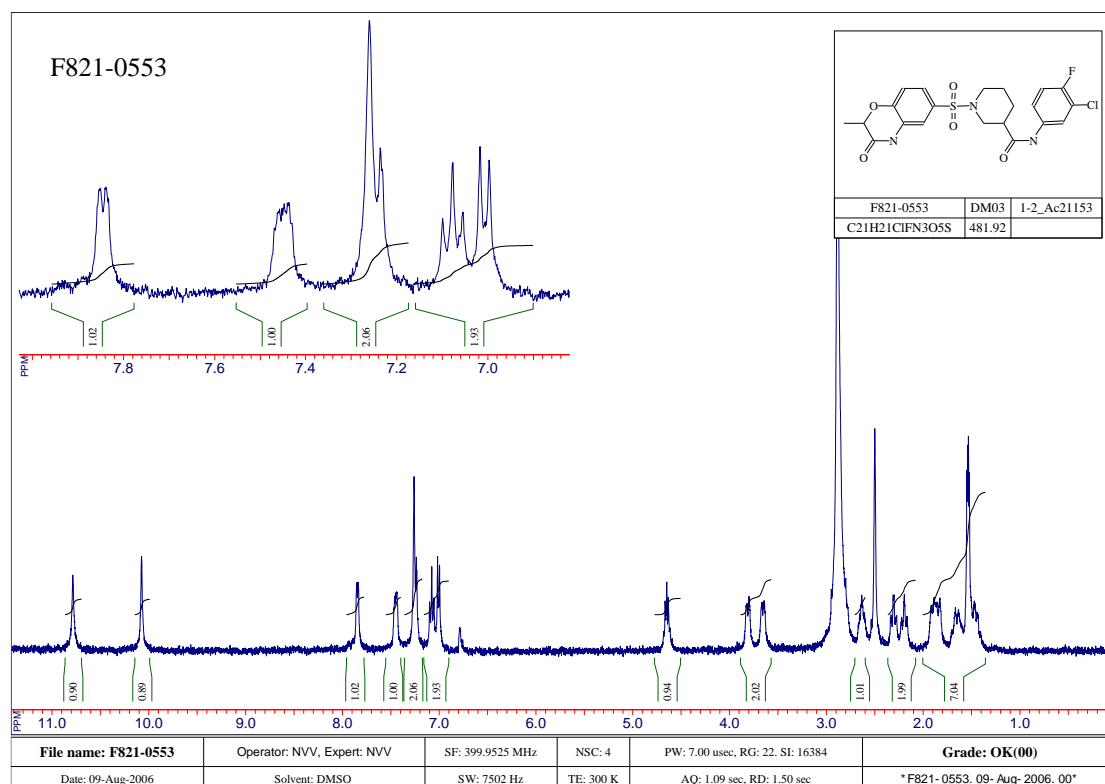

C-36

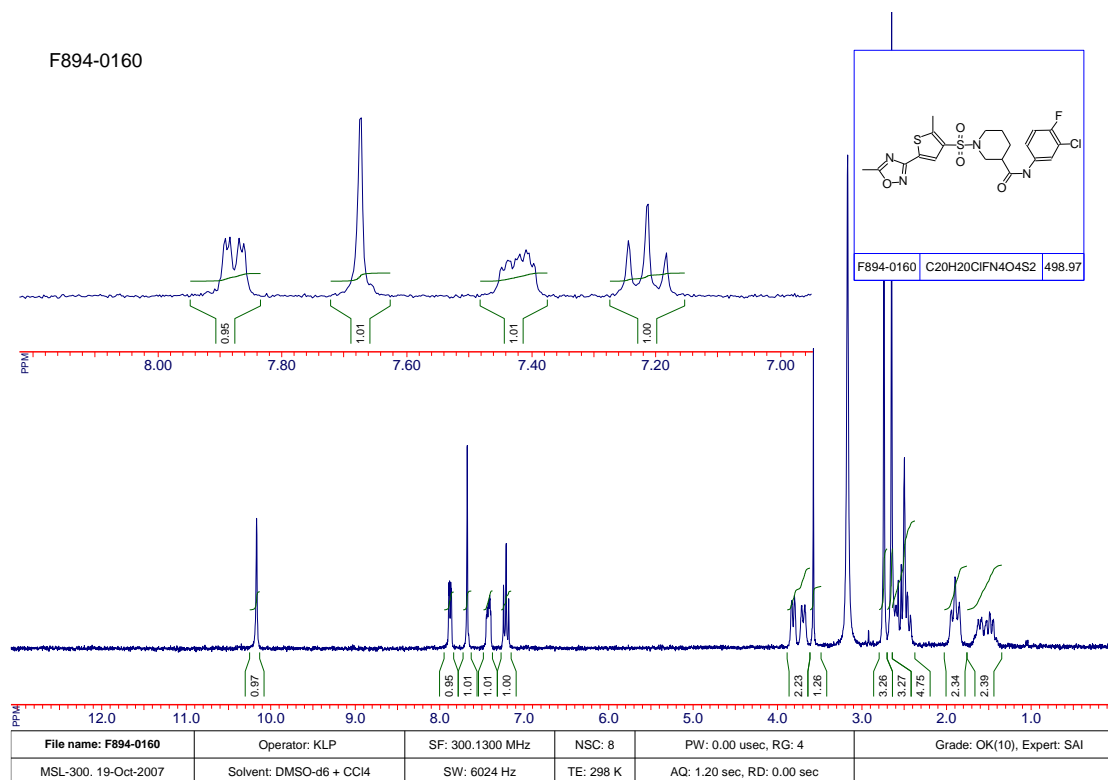

C-37

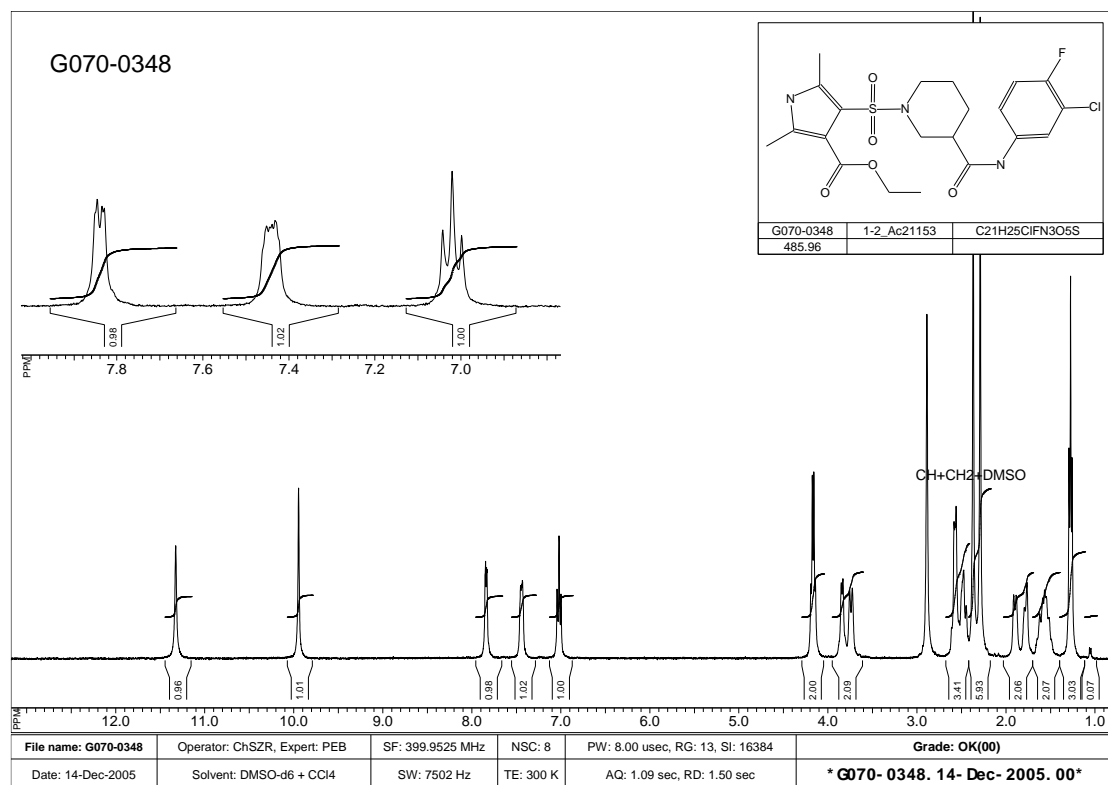

C-38

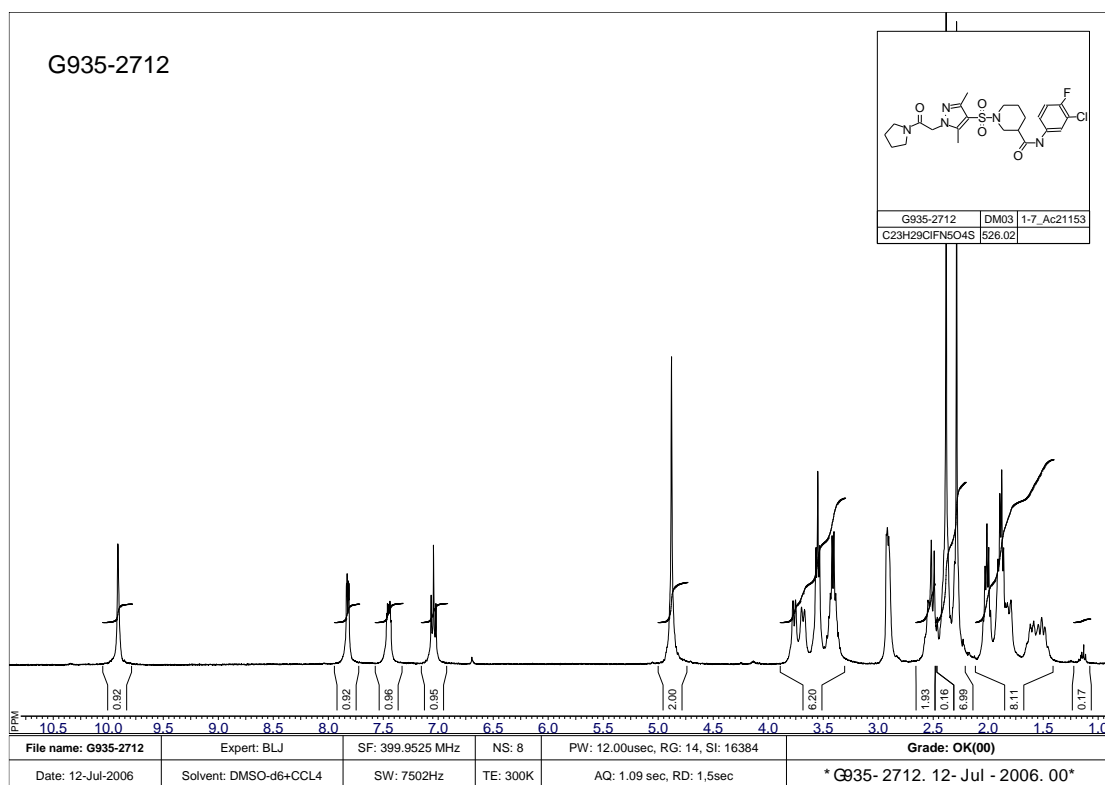

C-39

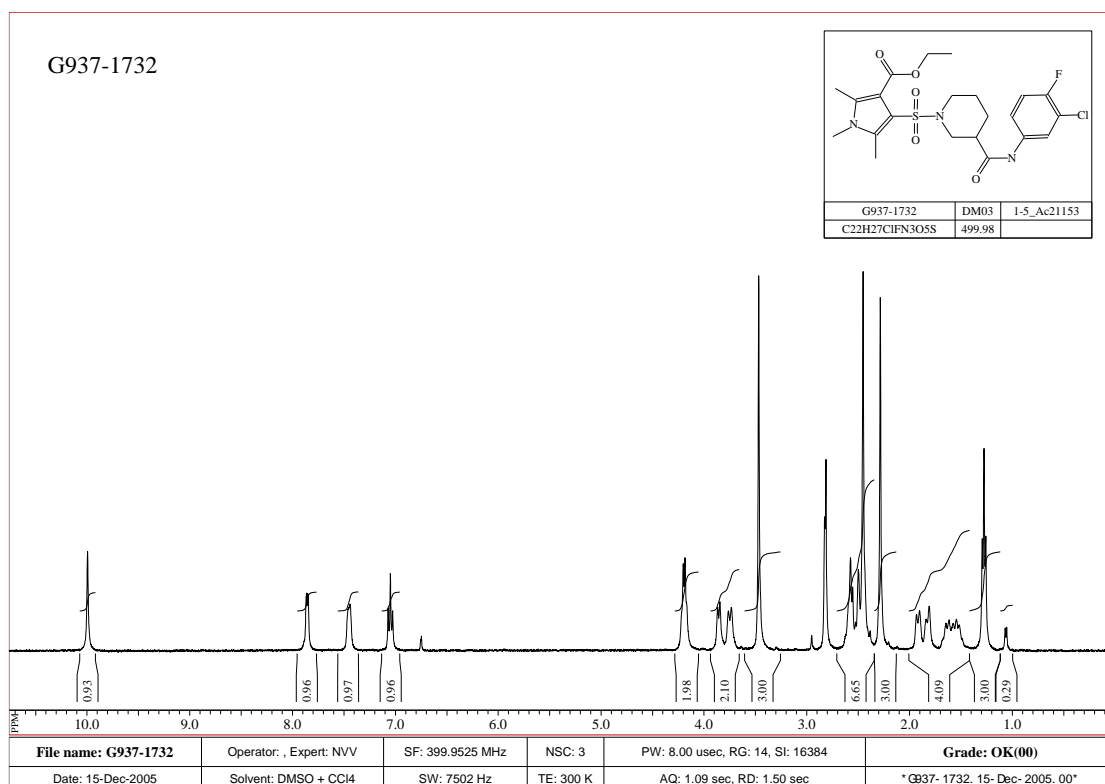

C-40

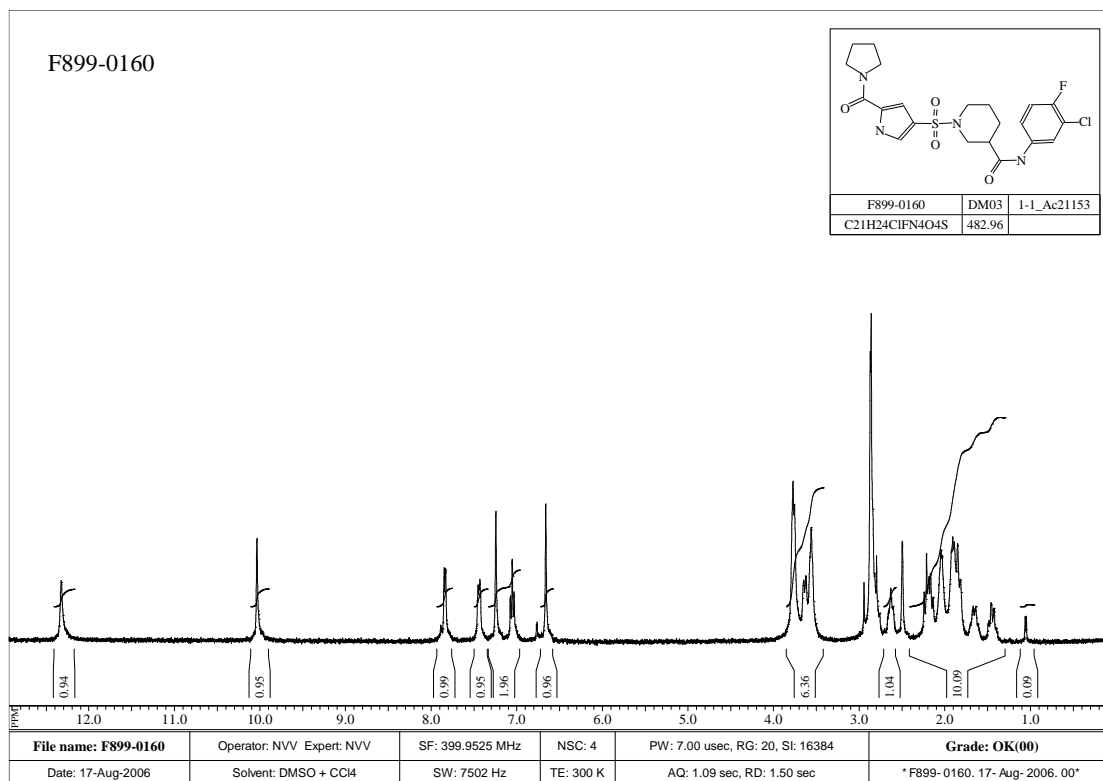

C-41

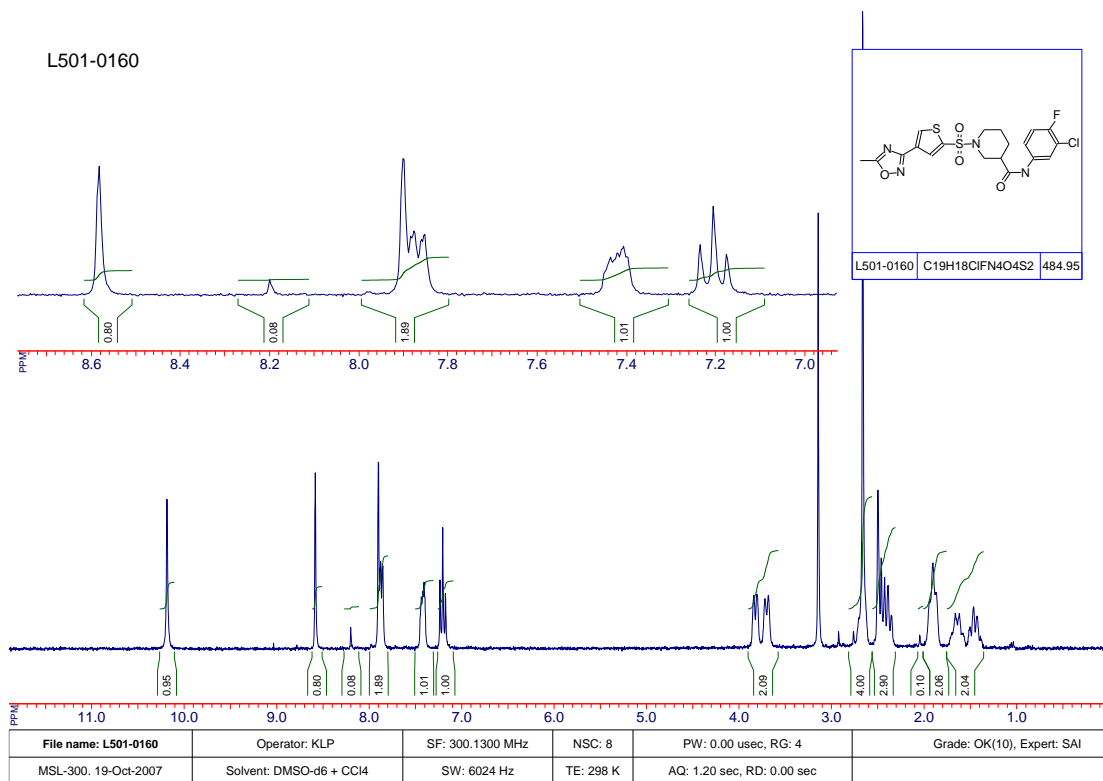

Supplement: Supplementary file 1 [file viruses-14-00348-s001.zip › viruses-1543846-supplementary.pdf]
